# The American Journal of Psychiatry

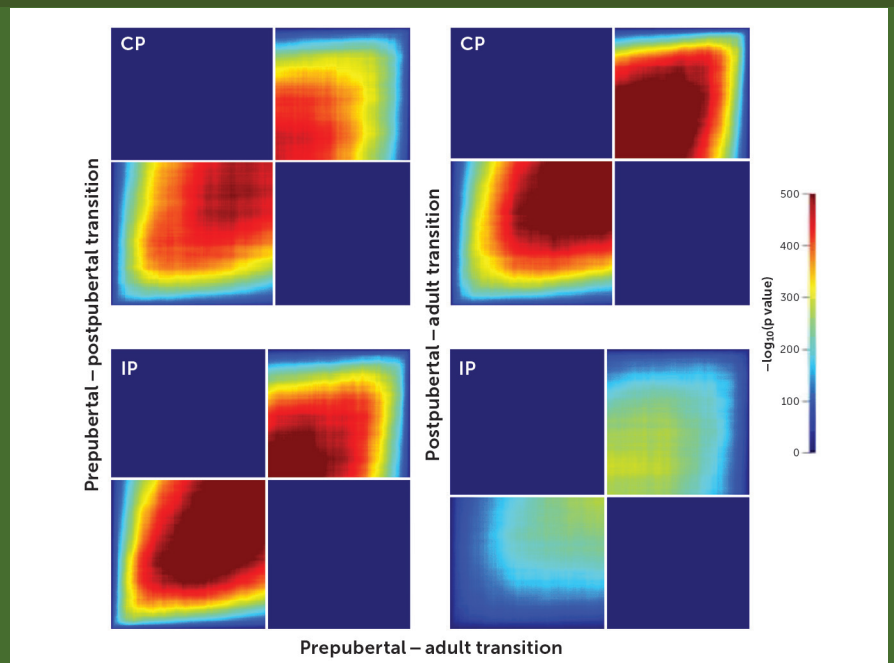

Real-World Effectiveness of Menopausal Hormone Therapy in Preventing  
Relapse in Women with Schizophrenia or Schizoaffective Disorder

Risk of Incident Psychosis and Mania With  
Prescription Amphetamines

Neural Circuitry and Therapeutic Targeting of Depressive  
Symptoms in Schizophrenia Spectrum Disorders

Cell Type–Specific Profiles and Developmental Trajectories of  
Transcriptomes in Primate Prefrontal Layer 3 Pyramidal Neurons
